# Supplementary material
Source: Springer Nature journal article supplement (https://www.springermedizin.de/resource/supplementary/12958_2004_145_MOESM16_ESM.pdf/9567240)

**SE covers ov cortex**

**SE covers TA**

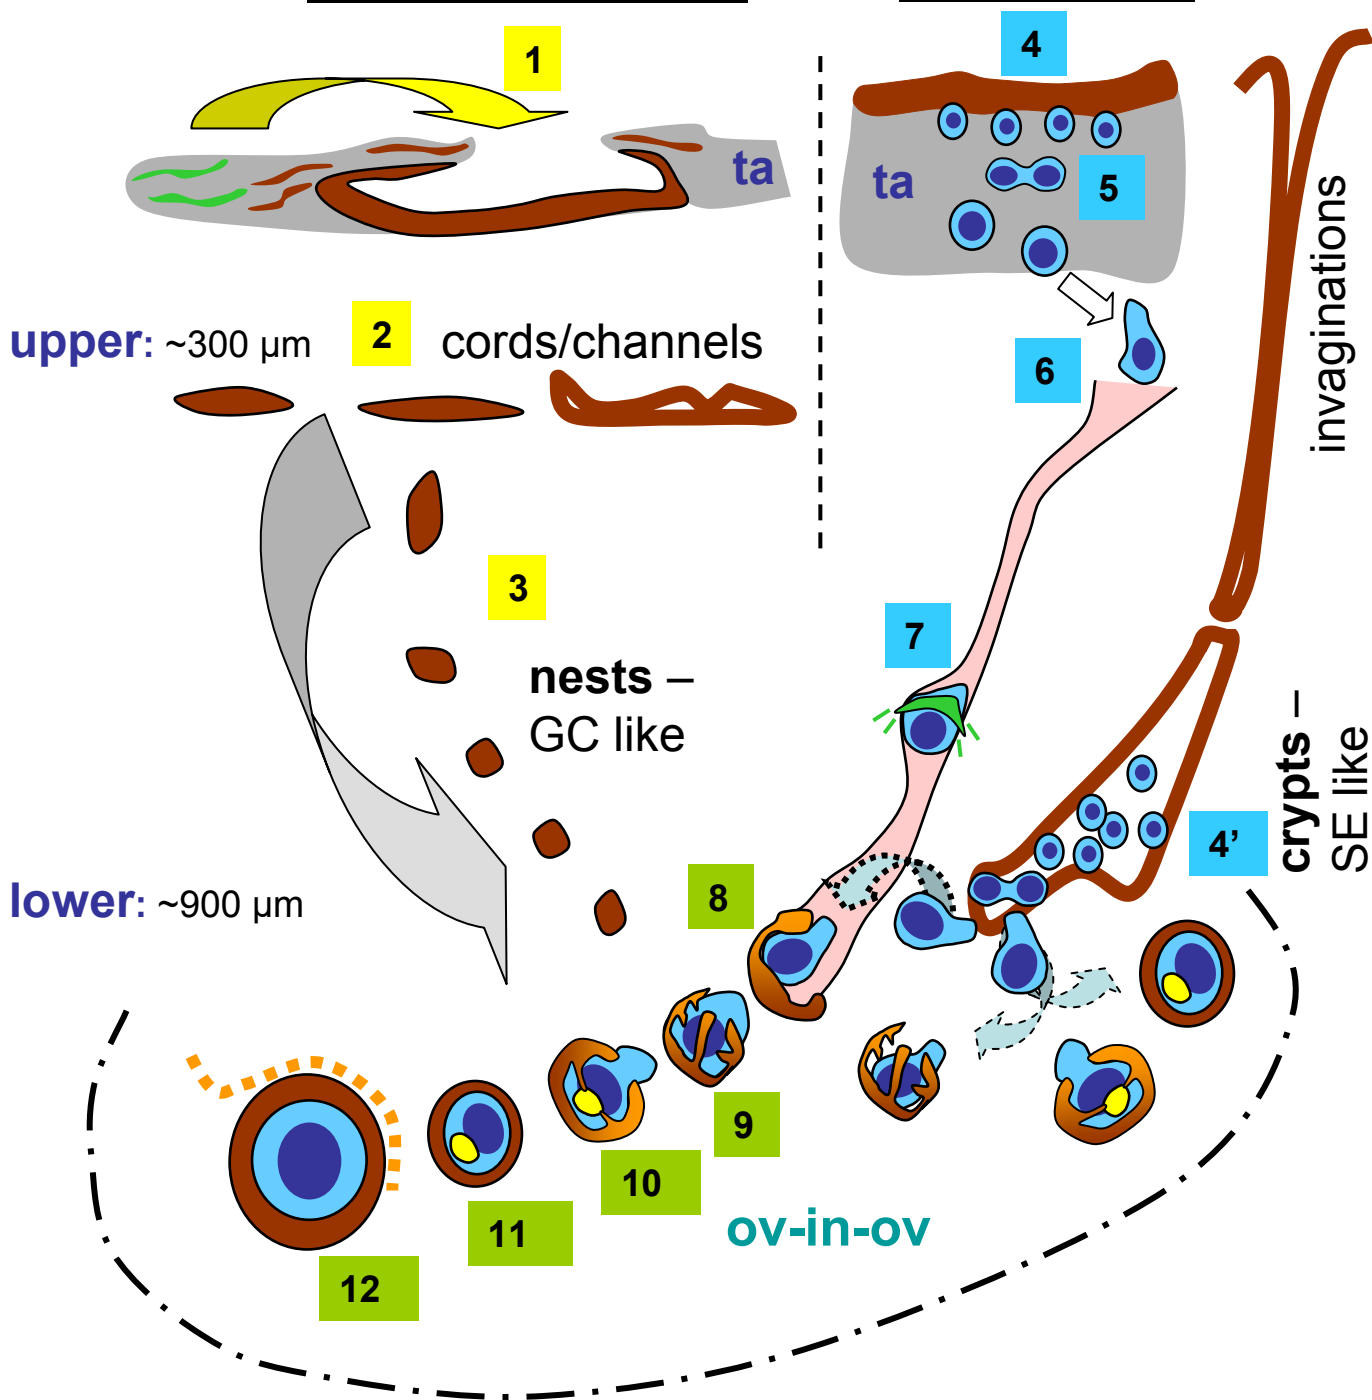

Supplement: MOESM16 [file 9567240]
